# Supplementary material for: Ferulic Acid Prevents Nonalcoholic Fatty Liver Disease by Promoting Fatty Acid Oxidation and Energy Expenditure in C57BL/6 Mice Fed a High-Fat Diet
Source: MDPI journal article supplement (doi:10.3390/nu14122530), 2022-06-18
Supplement: s1 [file s1]

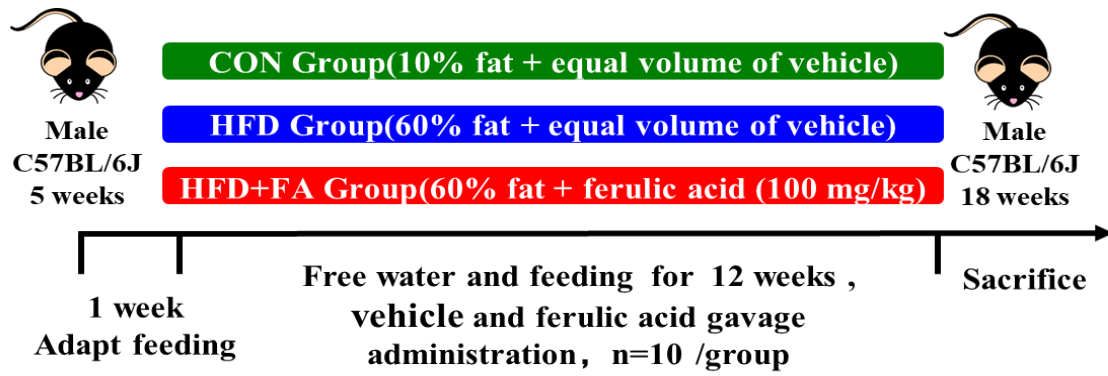

**Figure S1:** Schematic diagram of mice treatment.

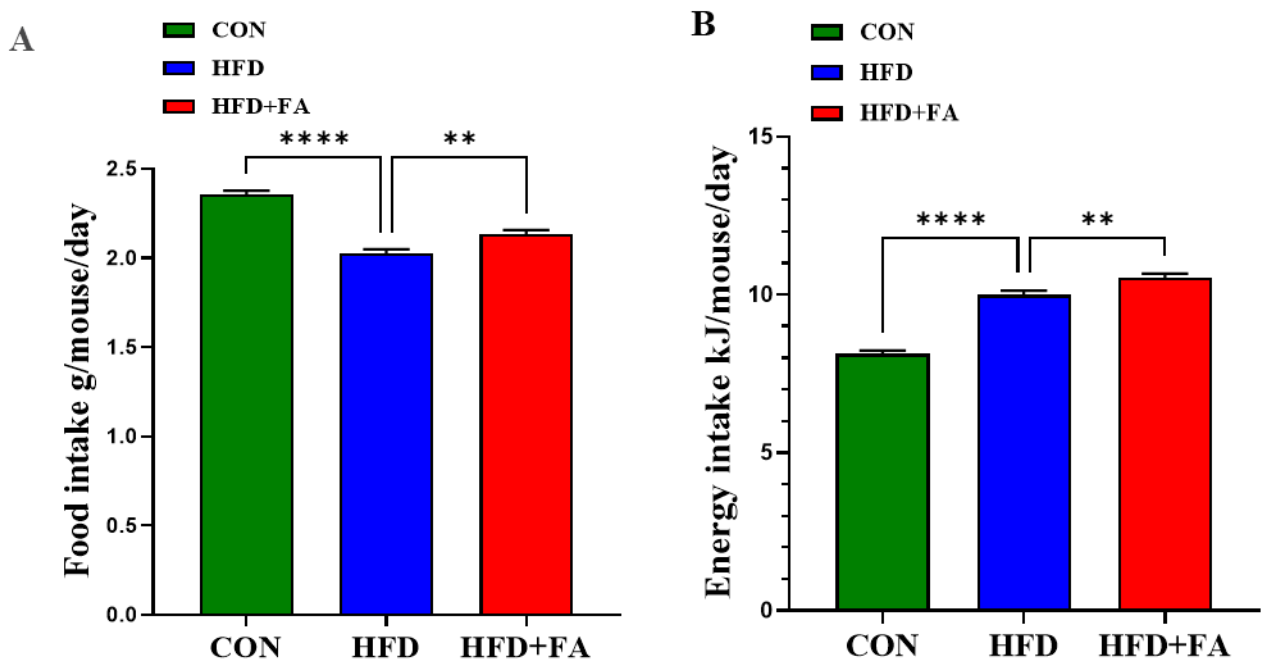

**Figure S2:** Effects of FA supplementation on food intake (A) and energy intake (B) in HFD-fed mice. Data are represented as mean  $\pm$  SEM. \*\* $p < 0.01$ , \*\*\*\* $p < 0.0001$ .

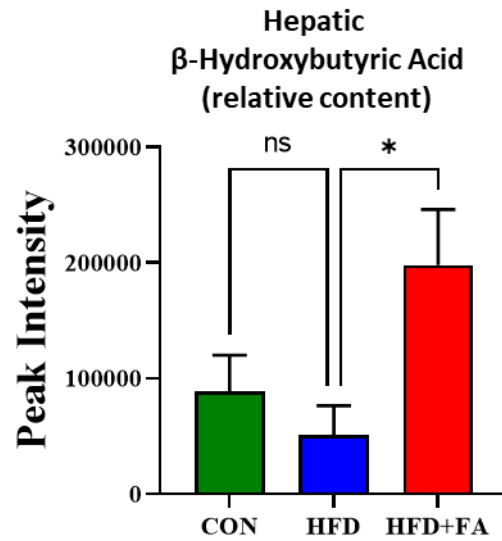

**Figure S3:** Effects of FA supplementation on hepatic β-hydroxybutyric acid in HFD-fed mice. Data are represented as mean ± SEM. \* $p < 0.05$ .

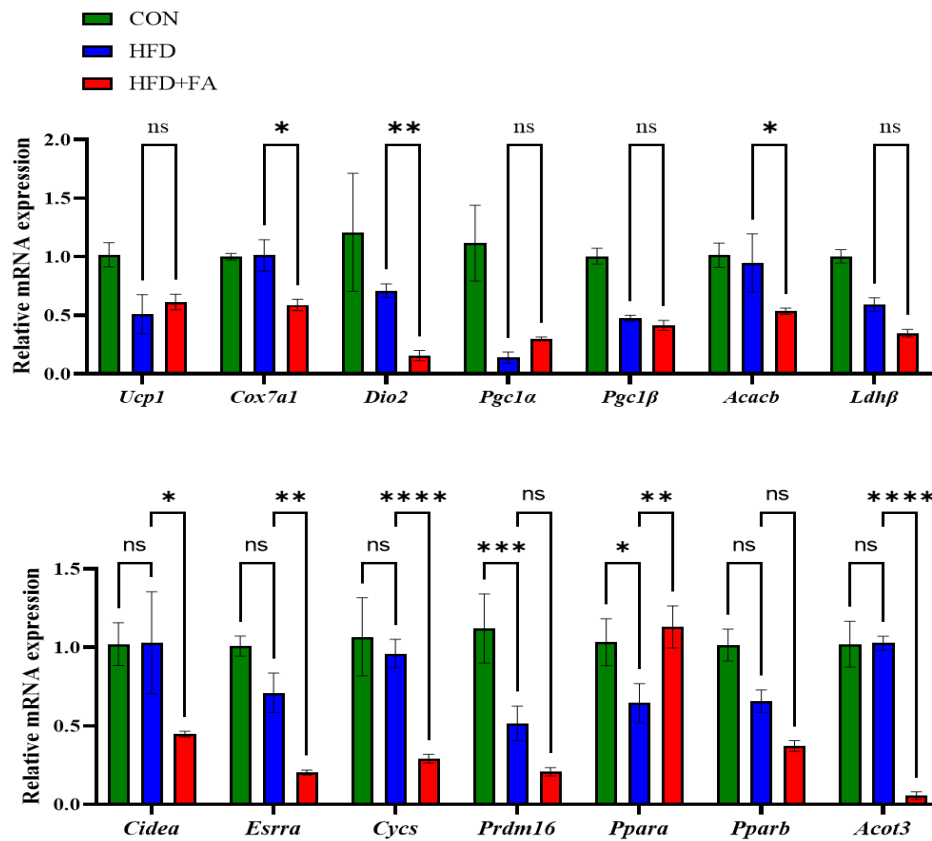

**Figure S4:** The expression of genes involved in lipolysis and fatty acid oxidation in brown adipose tissue. Data are represented as mean  $\pm$  SEM. \* $p < 0.05$ , \*\* $p < 0.01$ , \*\*\* $p < 0.001$ , \*\*\*\* $p < 0.0001$ .

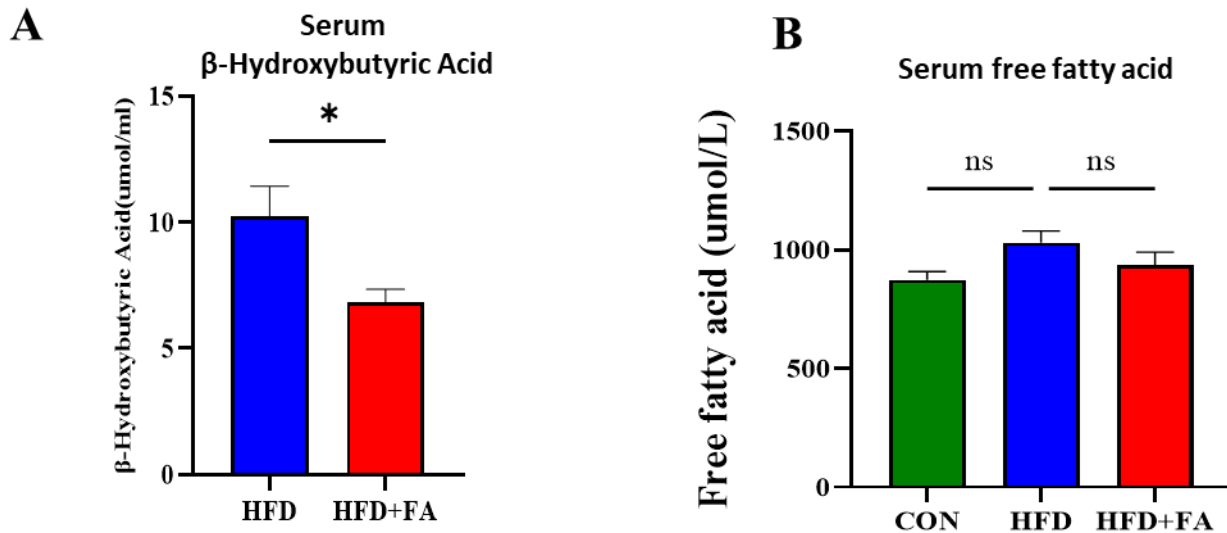

**Figure S5:** Effects of FA supplementation on serum(A)  $\beta$ -hydroxybutyric acid and free fatty acid (B) concentration in HFD-fed mice. Data are represented as mean  $\pm$  SEM. \* $p < 0.05$ .
